# Supplementary material for: Platelet studies in autism spectrum disorder patients and first-degree relatives
Source: PubMed Central journal article supplement (PMC4619313; doi:10.1186/s13229-015-0051-y), 2015-10-23

# Supplemental Figure 1

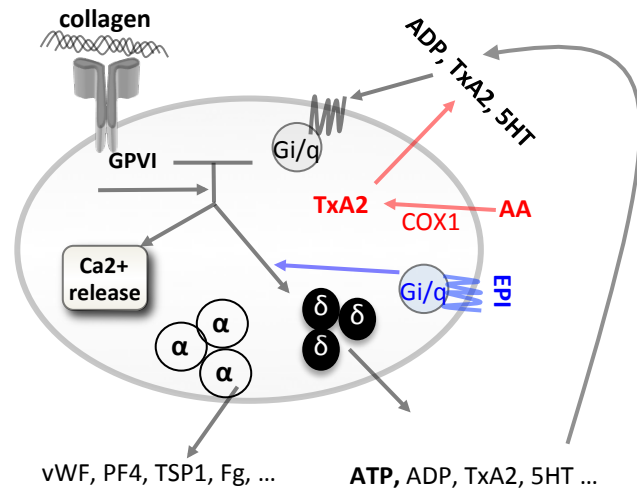

## Supplemental Figure 2

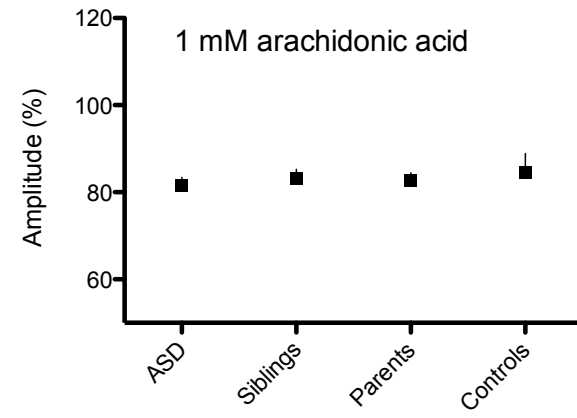

Supplement: 13229_2015_51_MOESM2_ESM.pdf [file 13229_2015_51_MOESM2_ESM.pdf]
